# Supplementary material for: 2-thio-6-azauridine inhibits Vpu mediated BST-2 degradation
Source: PubMed Central journal article supplement (PMC4776379; doi:10.1186/s12977-016-0247-z), 2016-03-02
Supplement: 12977_2016_247_MOESM2_ESM.pdf [file 12977_2016_247_MOESM2_ESM.pdf]

A

| number of replication | pNL-Luc-E- + pHIT/G<br>+pCDNA3.1<br>+DMSO | pNL-Luc-E- + pHIT/G<br>+pCDNA3.1<br>+2-thio-6-azauridine | pNL-Luc-E- + pHIT/G<br>+BST-2<br>+DMSO | pNL-Luc-E- + pHIT/G<br>+BST-2<br>+2-thio-6-azauridine |
|-----------------------|-------------------------------------------|----------------------------------------------------------|----------------------------------------|-------------------------------------------------------|
| 1                     | 877.5                                     | 841.2                                                    | 814.7                                  | 366.3                                                 |
| 2                     | 819.3                                     | 761.5                                                    | 789.0                                  | 355.5                                                 |
| 3                     | 916.1                                     | 817.0                                                    | 871.4                                  | 379.6                                                 |

B

| number of replication | Hela<br>+DMSO | Hela<br>+ 2-thio-6-azauridine | Hela-shRNA-BST-2<br>+DMSO | Hela-shRNA-BST-2<br>+ 2-thio-6-azauridine |
|-----------------------|---------------|-------------------------------|---------------------------|-------------------------------------------|
| 1                     | 291.1         | 108.7                         | 606.9                     | 374.0                                     |
| 2                     | 278.3         | 98.7                          | 656.9                     | 412.7                                     |
| 3                     | 320.6         | 95.6                          | 695.8                     | 429.4                                     |

Figure S2
