# Supplementary material for: 2-thio-6-azauridine inhibits Vpu mediated BST-2 degradation
Source: PubMed Central journal article supplement (PMC4776379; doi:10.1186/s12977-016-0247-z), 2016-03-02
Supplement: 12977_2016_247_MOESM3_ESM.pdf [file 12977_2016_247_MOESM3_ESM.pdf]

A

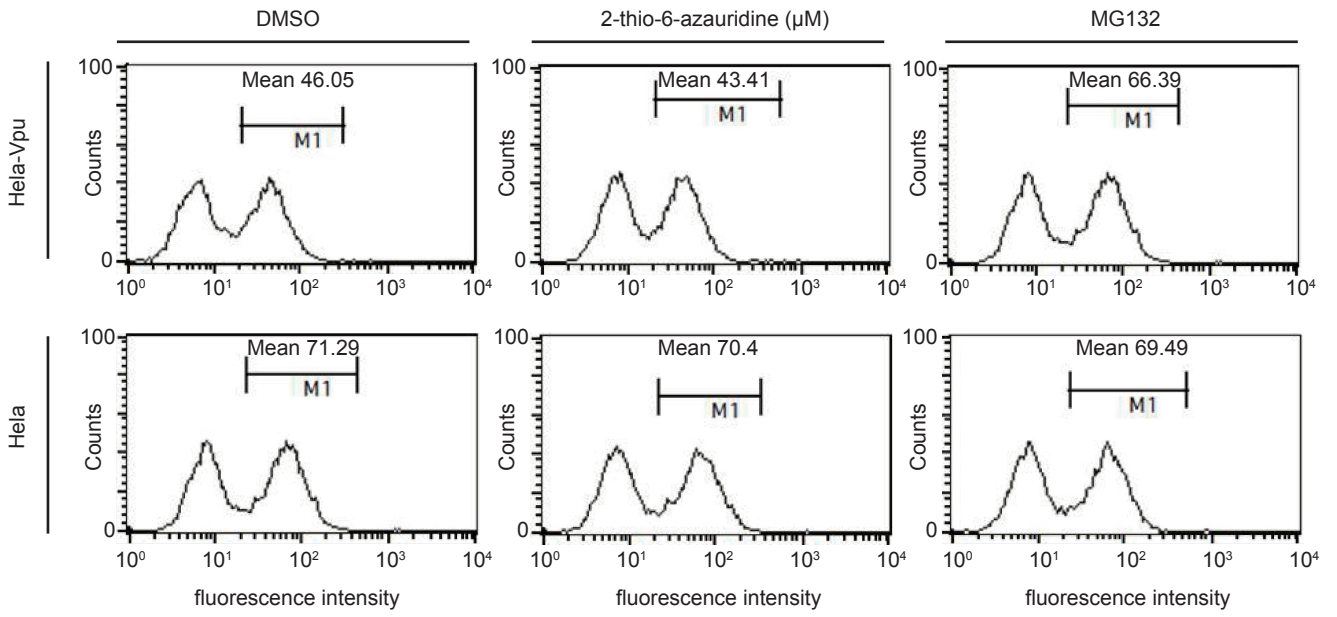

B

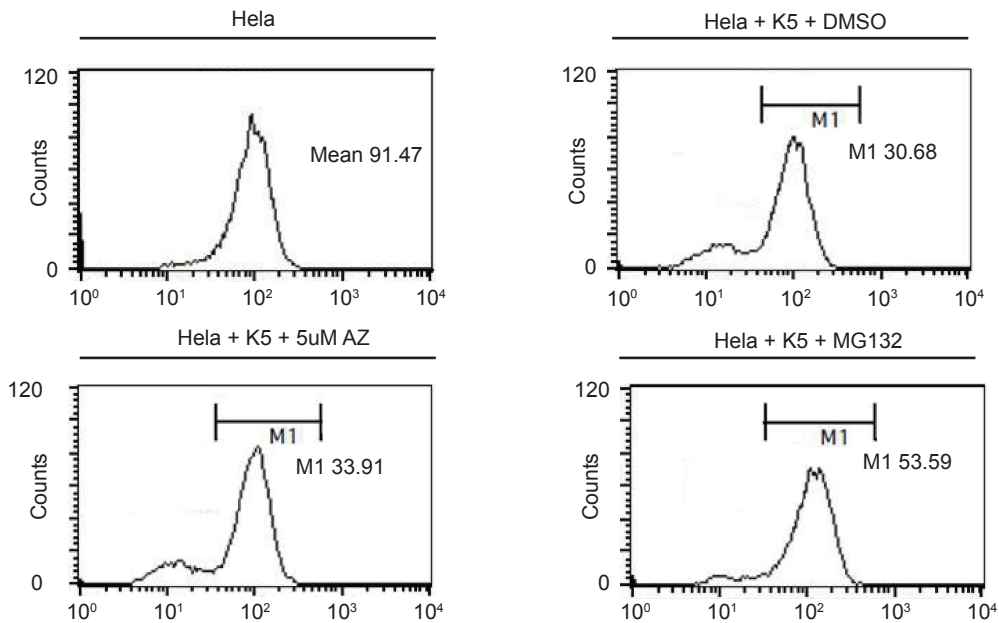

Figure S3
